1 **Title:**

2 **Prime editing of the  $\beta_1$  adrenoceptor in the brain reprograms mouse behavior**

3

4 **Authors:**

5 Desirée Böck<sup>1,#</sup>, Lisa Tidecks<sup>1,#</sup>, Maria Wilhelm<sup>1,#</sup>, Yanik Weber<sup>1</sup>, Eleonora Ioannidi<sup>1</sup>, Jonas  
6 Mumenthaler<sup>1</sup>, Tanja Rothgangl<sup>1</sup>, Lukas Schmidheini<sup>1,2</sup>, Sharan Janjuha<sup>1</sup>, Tommaso  
7 Patriarchi<sup>1</sup>, Gerald Schwank<sup>1,\*</sup>

8 <sup>#</sup>These authors contributed equally.

9

10 **Affiliations:**

11 <sup>1</sup>Institute of Pharmacology and Toxicology, University of Zurich, Zürich, Switzerland

12 <sup>2</sup>Institute of Molecular Health Sciences, ETH Zürich, Zürich, Switzerland

13

14 **Summary**

15 Prime editing is a highly versatile genome editing technology that holds great potential for  
16 treating genetic diseases<sup>1,2</sup>. While *in vivo* prime editing has recently been conducted in the  
17 brain, liver, heart, and retina<sup>3-6</sup>, application of this technology to modulate neural circuits in  
18 the brain has not been reported yet. Here, we employ adeno-associated viral vectors to deliver  
19 optimized intein-split prime editors into the brain of mice. Delivery into newborn pups via  
20 intracerebroventricular injection resulted in up to 44.0% editing at the *Dnmt1* locus in the  
21 cortex (on average 34.8±9.8% after 6 months). In addition, we obtained up to 28.1% editing at  
22 the *Adrb1* locus in the cortex (on average 14.7±11.6% after 6 months). The introduced  
23 *Adrb1*<sup>A187V</sup> mutation is a naturally occurring variant of the  $\beta_1$ -adrenergic receptor, which has  
24 previously been linked to increased activity and natural short sleep<sup>7</sup>. Similarly, we observed an  
25 increase in the activity and exploratory behavior of treated animals. This study demonstrates  
26 the potential of prime editing for treating genetic diseases in the central nervous system and for  
27 reprogramming molecular pathways that modulate animal behavior.

28

29 **Introduction**

30 Prime editing is a versatile genome editing technology that enables the installation of all small-  
31 sized genetic changes, including transversion/transition mutations, insertions, and deletions<sup>1</sup>.  
32 Prime editors (PEs) consist of an *SpCas9* nickase (H840A) fused to an engineered reverse  
33 transcriptase (RT) derived from the Moloney murine leukemia virus (M-MLV; hereafter

34 referred to as PE2)<sup>1</sup>. The *SpCas9*-RT fusion protein further complexes with a prime editing  
35 guide RNA (pegRNA), which consists of a primer binding site (PBS) and an edit-containing  
36 programmable RT template (RTT) fused to the 3' end of the guide RNA. In contrast to classical  
37 Cas9 nucleases, prime editing does not require the induction of error-prone DNA double-strand  
38 breaks and does not rely on homology-directed repair (HDR) to achieve accurate editing.  
39 Therefore, it also facilitates precise correction of mutations in non-dividing cells such as  
40 hepatocytes and retinal cells<sup>3-5</sup>.

41 Despite its potential for therapy, the efficiency of prime editing is still limited compared to  
42 Cas9 nucleases and base editors<sup>1,4,8-10</sup>. Several recent studies have attempted to improve the  
43 performance of prime editing by i) co-delivery of nicking sgRNAs (ngRNAs) that cut the non-  
44 edited strand simultaneously to the PE (PE3 ngRNAs) or after resolution of the edited strand  
45 (PE3b ngRNAs)<sup>1,2,4,11</sup>, ii) adding RNA-stabilizing pseudoknot structures to the 3' end of the  
46 pegRNA (hereafter referred to as epegRNAs)<sup>11</sup>, iii) using a codon-optimized PE variant that  
47 harbors additional mutations in the Cas9 nickase domain (R221K, N394K) and an adjusted  
48 linker/NLS design (PEmax)<sup>2</sup>, and iv) inhibiting DNA-mismatch repair (MMR) via co-  
49 expression of a dominant-negative MutL homolog 1 (dnMLH1)<sup>2</sup>. While these methods have  
50 been demonstrated to improve prime editing *in vitro*, their effect on *in vivo* prime editing  
51 efficiency is not well explored.

52 In this study, we developed a prime editing approach in the mouse brain using optimized  
53 pegRNA designs and expression vectors for adeno-associated virus (AAV) delivery. In  
54 addition to targeting *Dnmt1*, we introduced a behavior-affecting mutation in *Adrb1*, which  
55 encodes for the  $\beta$ 1-adrenoceptor ( $\beta$ 1-AR).  $\beta$ -ARs are activated by the neurotransmitter  
56 norepinephrine (NE; Extended data fig. 1a)<sup>12</sup>, and involved in a wide range of brain functions,  
57 including sleep/wake regulation<sup>13</sup>, memory<sup>14</sup>, and regulation of stress- and anxiety-induced  
58 responses<sup>15,16</sup>.  $\beta$ 1-ARs are particularly important for physiological functions of the sympathetic  
59 nervous system<sup>17,18</sup>, with the naturally occurring variant *Adrb1*<sup>A187V</sup> being linked to increased  
60 activity and short sleep in humans and mice<sup>7</sup>. Moreover, *Adrb1*<sup>A187V</sup> has recently been shown  
61 to improve sleep quality and to ameliorate tau accumulation in a mouse model of tauopathy<sup>19</sup>,  
62 showing that effects mediated by  $\beta$ 1-ARs can have various implications on health and disease.  
63 Using our optimized prime editing approach, we were able to introduce this mutation in various  
64 brain areas, leading to a change in animal behavior towards a heightened activity state.

65

66

## 67 **Results**

### 68 **Installation of the *Adrb1*<sup>A187V</sup> mutation via prime editing in cell lines**

69 To develop a prime editing approach for efficient installation of the A187V mutation in the  
70 *Adrb1* gene, we first tested different pegRNA designs at the endogenous locus in murine cell  
71 lines. We designed six pegRNAs encoding for the respective C-to-T edit with varying lengths  
72 of the RTT (11, 13, or 15 nucleotides [nt]) and PBS (10 or 13nt; Extended data fig. 1b). Vectors  
73 expressing the pegRNAs were first co-delivered with a PE2-expressing plasmid into murine  
74 Hepa1-6 and Neuro2a cell lines (hereafter referred to as Hepa and N2a). However, since deep  
75 sequencing of the target locus revealed low editing rates with all tested pegRNAs (< 2%;  
76 Extended data fig. 1c), potentially because the *Adrb1* is inaccessible in these cell lines  
77 (Extended data fig. 1d,e), we next generated HEK cells where the targeted *Adrb1* region is  
78 integrated into the genome using the PiggyBac transposon system<sup>20</sup> (Extended data fig. 1f).  
79 Transfection of PE2 together with the different pegRNAs, either alone or in combination with  
80 different ngRNAs, identified pegRNA1 with a 10-nt PBS and 11-nt RTT as the most efficient  
81 pegRNA in installing the *Adrb1*<sup>A187V</sup> mutation without inducing high rates of indels (Fig. 1a;  
82 extended data fig. 1b).

83 Structural 3' modifications that protect pegRNAs from exonucleases have previously been  
84 reported to enhance editing efficiencies<sup>11</sup>. Therefore, we next tested whether fusing the  
85 stabilizing structural motifs tevpreQ<sub>1</sub> and tmpknot to the 3' end further enhances activity of  
86 pegRNA1. While adding the tmpknot motif did not have an impact on editing rates, adding the  
87 tevpreQ<sub>1</sub> motif resulted in a 1.4-fold increase in pegRNA1 activity (Fig. 1b). Notably, we also  
88 tested if adding stabilizing motifs to the 3' end of ngRNAs increased editing efficiency, but did  
89 not observe significant changes at various loci (Extended data fig. 2). Finally, we assessed  
90 whether exchanging the scaffold of the pegRNA with an optimized sgRNA scaffold harboring  
91 an extended duplex length and a base substitution in the poly-thymidine stretch further  
92 increases editing<sup>21</sup>. Although statistically not significant, the optimized scaffold led to higher  
93 activity of pegRNA1, with- and without the tevpreQ<sub>1</sub> motif (Extended data fig. 3). Based on  
94 these results, we decided to select the tevpreQ<sub>1</sub>-modified pegRNA1 with the optimized  
95 scaffold (epegRNA1) for subsequent experiments.

96

### 97 **Optimizing epegRNA1 for MMR proficient cells**

98 DNA mismatch repair (MMR) has been shown to impede prime editing and promote undesired  
99 indel byproducts<sup>2,22</sup>. This could be a limitation for *in vivo* prime editing in the brain, which  
100 contains MMR proficient cells<sup>23</sup>. Therefore, we next integrated the *Adrb1* reporter into MMR

101 proficient Hepa- and N2a cells and assessed editing rates of epegRNA1 with PE2 or the  
102 optimized PE variant PEmax. In line with the hypothesis that MMR negatively affects prime  
103 editing, editing rates were significantly lower than in HEK cells ( $1.6\pm 1.5\%$  for PE2 and  
104  $2.0\pm 0.4\%$  for PEmax in Hepa cells;  $0.4\pm 0.1\%$  for PE2 and  $3.0\pm 1.3\%$  for PEmax in N2a cells;  
105 extended data fig. 4d), and inhibiting MMR via shRNA-mediated downregulation of *Mlh1* or  
106 *Msh2* or co-expression of dominant negative MLH1<sup>2</sup> led to an increase in editing rates (up to  
107 3.2-fold in Hepa- and 3.4-fold in N2a cells; extended data fig. 4a-d). Since MMR defects are a  
108 major driver for different cancers<sup>24</sup>, *in vivo* inhibition of MMR is likely detrimental, prompting  
109 us to assess if the inhibitory effect of MMR on prime editing could be circumvented by i) using  
110 the PE3b approach, or ii) modifying epegRNA1 to additionally introduce silent mutations  
111 (SMs) in the protospacer and PAM<sup>2,25</sup>. Co-transfection of a PE3b ngRNA indeed led to a  
112 pronounced increase of editing rates in Hepa (6.8-fold) and N2a cells (1.7-fold; fig.1c).  
113 Likewise, three of the five epegRNA1 variants encoding for additional SMs led to substantially  
114 higher editing in Hepa (up to 5.2-fold) and N2a cells (up to 2.3-fold) in an MMR independent  
115 manner (Fig. 1d; extended data fig. 4e), with epegRNA1-SM<sup>CTT</sup> showing highest editing  
116 efficiencies (HEK:  $44.0\pm 3.7\%$ ; Hepa:  $15.9\pm 3.6\%$ ; N2a:  $11.0\pm 2.7\%$ ). When combined with a  
117 PE3b ngRNA, editing rates of epegRNA1-SM<sup>CTT</sup> could be even further enhanced (Fig. 1e).  
118 Notably, epegRNAs encoding for SMs that edit the PAM, and hence abolish re-targeting of the  
119 site after installation of the edit, also resulted in a substantial reduction of indel rates (Fig. 1c).  
120 Based on these results, we decided to use PEmax together with epegRNA1 and epegRNA1-  
121 SM<sup>CTT</sup> in the PEmax or PE3b approach for subsequent *in vivo* experiments.

122

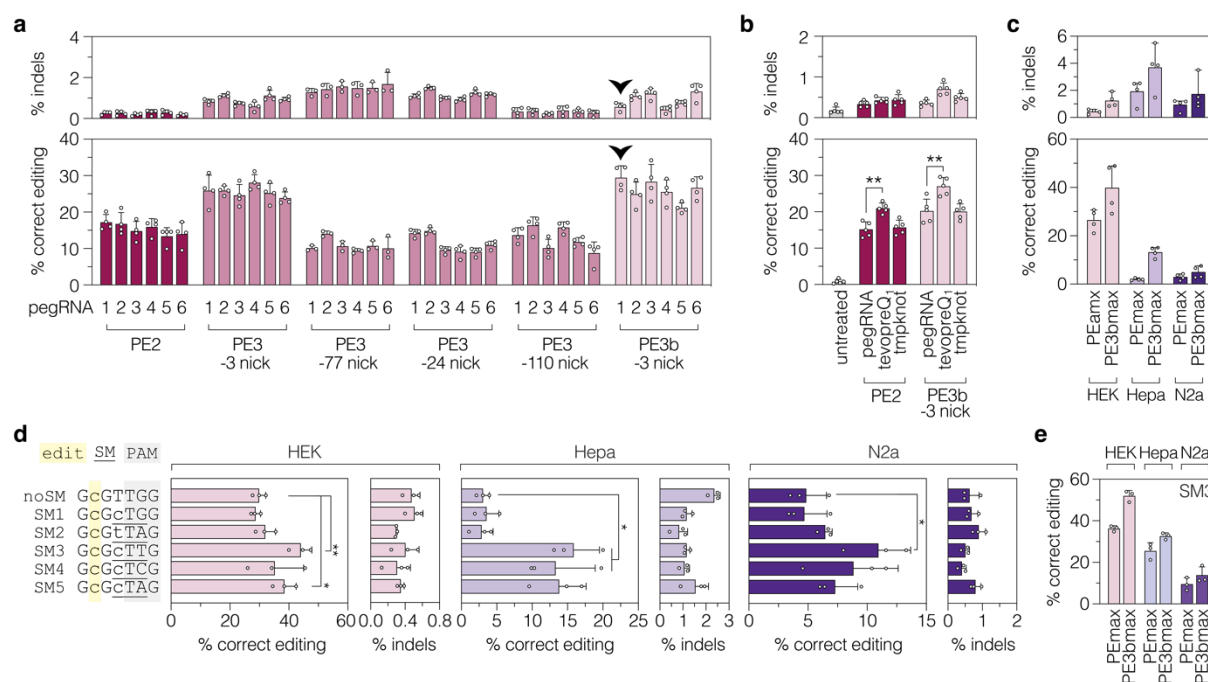

123  
 124 **Figure 1: Optimization of pegRNAs and ngRNAs at the *Adbr1* locus.** (a) Editing and indel  
 125 rates of six pegRNAs alone (PE2) or combined with different PE3 ngRNAs or a PE3b ngRNA  
 126 in HEK *Adrb1* reporter cells. The location of the second nick relative to the installed edit is  
 127 indicated. The black arrowhead labels pegRNA1, which was used for subsequent experiments.  
 128 (b) Editing and indel rates of tevpreQ<sub>1</sub>- and tmpknot-epgRNA1 in HEK *Adrb1* reporter cells.  
 129 Data are displayed as means±s.d. of at least three independent experiments. nt, nucleotides. (c)  
 130 Editing and indel rates of epegRNA1 in combination with a PE3b ngRNA in HEK, Hepa, N2a  
 131 *Adrb1* reporter cells. (d) Editing and indel rates of epegRNAs encoding for SMs in HEK, Hepa,  
 132 N2a *Adrb1* reporter cells. The position of the edit (yellow), PAM sequence (gray), and SMs  
 133 (underlined) are indicated. (e) Editing and indel rates of epegRNA-SM<sup>CTT</sup> without (PEmax)  
 134 and with (PE3bmax) a ngRNA. Data are displayed as means±s.d. of at least three independent  
 135 experiments and were analyzed using a two-tailed Student's t-test with Welch's correction  
 136 (\* $P < 0.05$ ; \*\* $P < 0.005$ ). If not indicated, differences were not statistically significant ( $P > 0.05$ ).

137

### 138 **Generation of optimized intein-split PE variants for AAV-mediated delivery**

139 Due to low immunogenicity, rare genomic integration, and the ability to efficiently infect  
 140 neurons and astrocytes, AAVs are promising vectors for *in vivo* delivery of genome editors into  
 141 the central nervous system (CNS)<sup>26</sup>. As PEs exceed the packaging limit of AAVs (~5 kb  
 142 including ITRs)<sup>27</sup>, we have employed the *Npu* intein-mediated protein trans-splicing system to  
 143 split the PE into two parts for expression from two separate AAVs<sup>5,28–32</sup>.

144 To further optimize intein-split PE vectors towards accommodating a variety of promoters  
145 and terminators for wide-range usage, we first generated nine PE variants split at different  
146 surface-exposed sites and assessed their activity on a GFP reporter and the *Adrb1* locus. Of the  
147 tested variants PE-p.713/714 was the most efficient, maintaining over 90% of the activity of  
148 the unsplit PE (Extended data fig. 5a-b). Next, we generated AAV expression cassettes where  
149 the N- and C-terminal fragments of PE-p.713/714 were cloned downstream of the neuron-  
150 specific human synapsin (hsyn) promoter<sup>33</sup>. While the vector encoding for the N-terminal PE  
151 fragment was small enough to additionally harbor expression cassettes for the epegRNA and  
152 ngRNA (Fig. 2a), the C-terminal fragment would have exceeded the AAV packaging limit  
153 (Extended data fig. 5d). Therefore, we generated C-terminal constructs where we removed the  
154 dispensable RnaseH domain from the RT<sup>5,34</sup> (Fig. 2a; extended data fig. 5c), and exchanged  
155 the commonly used W3-bGH terminator<sup>35,36</sup> with smaller terminators. These either lacked the  
156 W3 post-transcriptional regulatory element, or used shorter polyadenylation signals (SV40 or  
157 synthetic polyA instead of bGH polyA) (Fig. 2a; Extended data fig. 5d). *In vitro* comparison  
158 of the shorter terminators to the W3-bGH terminator revealed higher editing rates with the bGH  
159 terminator that lacked the W3 element (PEmax: 23.8±0.9%; PE3bmax: 38.2±2.6%), and with  
160 the terminators that contained the W3 element but used either the synthetic polyA (PEmax:  
161 28.0±3.3%; PE3bmax: 27.0±7.3%;) or SV40 polyA (PEmax: 21.2±6.8%; PE3bmax:  
162 23.8±5.6%; extended data fig. 5e). These three C-terminal PE vector designs were therefore  
163 selected for further testing with the N-terminal PE vector in *in vivo* prime editing experiments.  
164

### 165 ***In vivo* prime editing at the *Adrb1* and *Dnmt1* locus in the brain**

166 To deliver PE constructs into the brain of newborn C57BL/6 mice, we packaged the selected  
167 N- and C-terminal PE expression vectors into AAV capsids of the serotype PHP.eB (Fig 2a,b).  
168 In addition to targeting the *Adrb1* locus with epegRNA1 in the PE3b approach, we targeted the  
169 *Dnmt1* locus using a pegRNA that has previously been employed in the liver<sup>5</sup>, further stabilized  
170 with the tevopreQ<sub>1</sub> structural motif (extended data table 1). Efficient packaging of the N- and  
171 C-terminal PE expression vectors into AAVs was first confirmed by negative staining electron  
172 microscopy (Extended data fig. 6a-d), and particles were delivered to the ventricles of neonatal  
173 mice via intracerebroventricular (ICV) injection at a dose of 5×10<sup>10</sup> vg per construct and animal  
174 (Fig. 2b). Brains were isolated and cortices were manually dissected at different timepoints  
175 post-injection to quantify editing outcomes by deep amplicon sequencing (Fig. 2c). At 5 weeks,  
176 mouse cortices showed on average 13.3% editing at the *Adrb1* locus (for W3-synth) and 27.7%

177 editing at the *Dnmt1* locus (for noW3-bGH), without significant differences between the three  
178 different minimal terminators utilized in the C-terminal PE constructs (Fig. 2c). In line with  
179 these results, RT-qPCR analysis revealed similar C-terminal PE expression levels from the  
180 different constructs (Extended data fig. 5e,f). Editing rates were maintained over time at both  
181 loci as assessed by deep amplicon sequencing at 10 weeks ( $17.6\pm 8.6\%$  for W3-synth at the  
182 *Adrb1* locus and  $32.7\pm 13.1\%$  for noW3-bGH at the *Dnmt1* locus) and 6 months post-injection  
183 ( $14.7\pm 11.6\%$  for W3-synth at the *Adrb1* locus and  $34.8\pm 9.8\%$  for noW3-bGH at the *Dnmt1*  
184 locus; fig. 2c). Similarly, the formation of indels, primarily caused by the nickase activity of  
185 Cas9 rather than integration of the sgRNA scaffold (Extended data fig. 7), did not increase over  
186 time and remained at  $2.3\pm 1.8\%$  at the *Adrb1* locus and  $1.0\pm 0.1\%$  at the *Dnmt1* locus (cortices  
187 at 6 months; fig. 2c).

188 Next, we analyzed variations in editing rates across different brain regions and cell types.  
189 As expected from differences in the transduction efficiency of AAV PHP.eB across various  
190 brain regions after ICV injections (Extended data fig. 8)<sup>37</sup>, we observed differences in editing  
191 rates that roughly reflected the AAV transduction efficiencies in the corresponding regions  
192 (Fig. 2d). The use of the hsyn promoter, moreover, limited PE expression to neurons (Extended  
193 data fig. 9). Thus, when we analyzed editing rates in neuron-enriched cell populations, we  
194 observed a 4- and 2-fold increase in editing rates for *Adrb1* and *Dnmt1*, respectively (Extended  
195 data fig. 10). In line with neuron-specific prime editing, we did not observe editing above  
196 background in any of the other tested organs except the spinal cord (Fig. 2e). Of note,  
197 exchanging the hsyn promoter with the ubiquitously active Cbh promoter<sup>38</sup> and replacing the  
198 W3-bGH terminator (477 bp) on N- and C-terminal AAV vectors with the synthetic polyA (49  
199 bp) resulted in  $25.0\pm 1.9\%$  editing at the *Dnmt1* locus in the brain, despite using half the dose  
200 compared to previous experiments ( $2.5\times 10^{10}$  vg per construct and animal; fig. 2f), and in editing  
201 in the liver ( $14.2\pm 6.2\%$ ) and the heart ( $2.5\pm 0.9\%$ ; fig. 2f) at 10 weeks post-injection (ICV).  
202 These data suggest that efficient prime editing in the brain neither requires the W3 element  
203 nor long terminators when the PE is expressed from strong promoters.

204

205 *In vitro* in cell lines epegRNA1-SM<sup>CTT</sup> enabled high on-target editing with substantially lower  
206 indel formation rates compared to epegRNA1 (with- or without the PE3b nicking sgRNA),  
207 prompting us to also test this pegRNA *in vivo*. epegRNA1-SM<sup>CTT</sup> was cloned into the N-  
208 terminal PEmax expression vector and co-delivered with the C-terminal PEmax expression  
209 vector. However, in contrast to our *in vitro* results in Hepa and N2a cells (Fig. 1c), *in vivo*

210 editing rates were substantially lower than with epegRNA1 in the PE3b approach ( $2.1 \pm 1.3\%$   
 211 vs.  $13.2\% \pm 8.3\%$  at 5 weeks post-injection; Fig. 2c,g), and also co-expression of the PE3b-  
 212 ngRNA together with epegRNA1-SM<sup>CTT</sup> did not increase editing rates ( $1.3 \pm 0.5\%$ ; fig. 2g).  
 213 Nevertheless, indel rates were significantly lower with epegRNA1-SM<sup>CTT</sup> than with  
 214 epegRNA1 and at the levels of saline-treated controls (Fig. 2g). Thus, while editing of the PAM  
 215 sequence did not enhance editing efficiency, it led to a significant reduction in indel formation.  
 216 Consistent with this theory, indel rates at the *Dnmt1* locus, where we converted the second G  
 217 of the PAM into a C, was also at background levels (Fig. 2c,d).  
 218

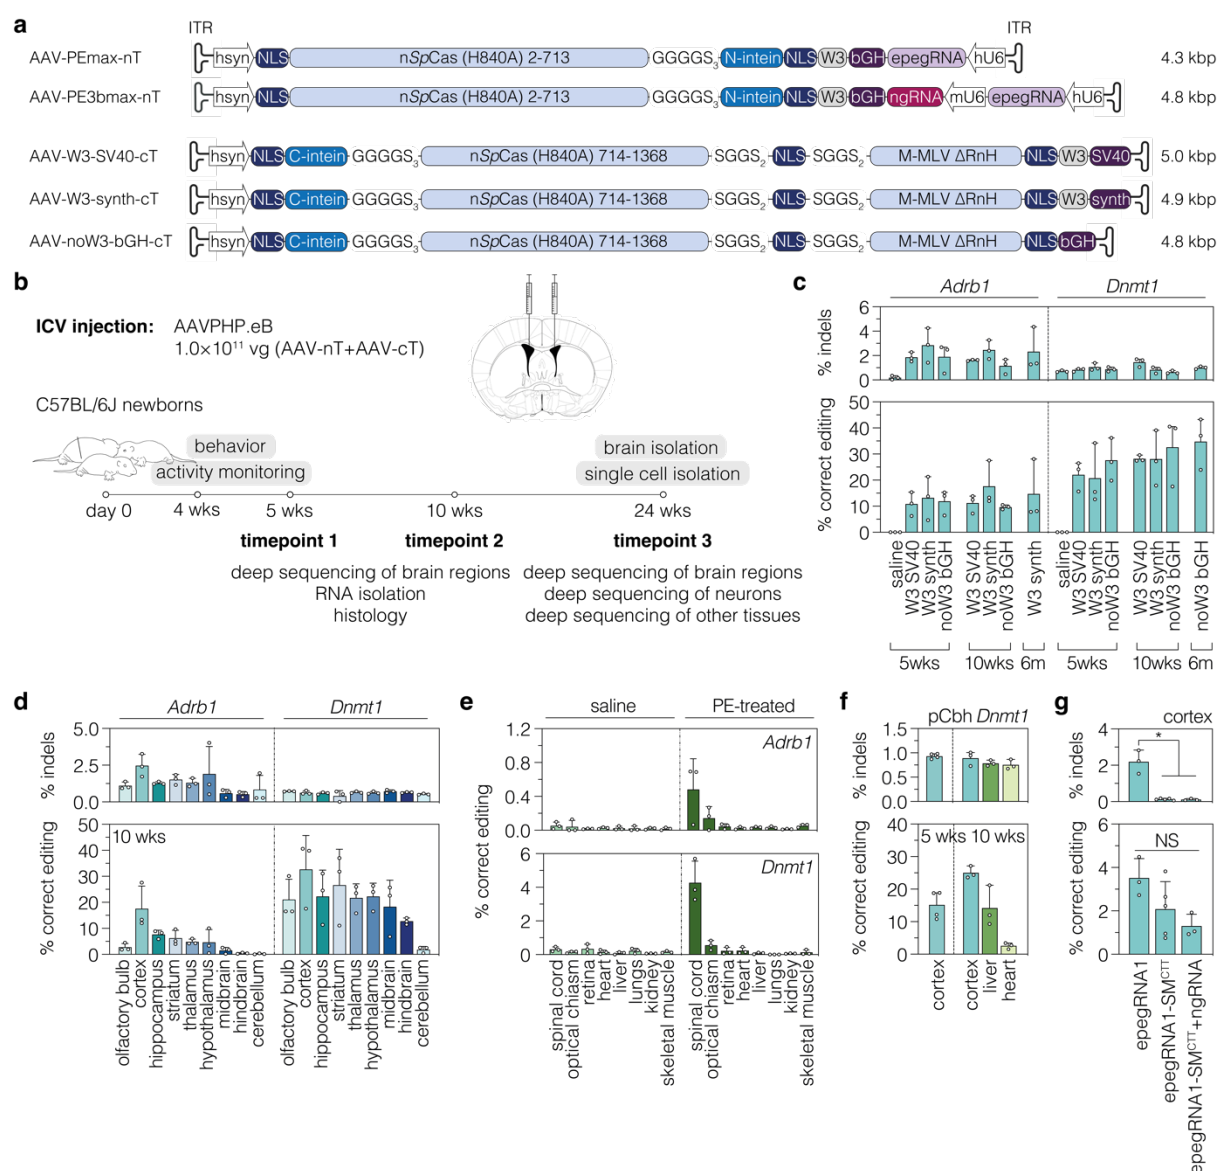

219  
 220 **Figure 2: *In vivo* prime editing at the *Dnmt1* and *Adrb1* locus in the brain.** (a) Schematic  
 221 representation of AAV designs used *in vivo* and their corresponding lengths in kilobase pairs  
 222 (kbp, including ITRs) for neuron-specific expression of PEmax or PE3bmax. Constructs are



223 not depicted to scale. (b) Schematic representation of the experimental setup and timeline. (c)  
224 *In vivo* prime editing and indel rates of different AAV vector designs in mouse cortices at 5  
225 weeks, 10 weeks and 6 months post-injection. (d) Editing and indel rates at the *Adrb1* (AAV-  
226 PE3bmax-nT and W3-synth-cT) and *Dnmt1* (AAV-PEmax-nT and noW3-bGH-cT) locus in  
227 different brain regions at 10 weeks post-injection. (e) Frequency of *Adrb1* and *Dnmt1* edits in  
228 various other tissues in saline- and phsyn-PE-treated animals at 6 months post injection.  
229 Animals were treated with the same AAV preparations as in (d). Skeletal muscle tissue was  
230 isolated from the quadriceps femoris. (f) Editing rates at the *Dnmt1* locus in mouse cortices (5  
231 and 10 weeks post-injection), liver, and heart (10 weeks post-injection) after ICV injection.  
232 Animals were treated with PEmax-noW3-synth-nT and noW3-synth-cT under the control of  
233 the ubiquitous Cbh promoter<sup>38</sup>. (g) Comparison of editing and indel rates at the *Adrb1* locus  
234 for PEmax complexed with epegRNA1 or epegRNA1-SM<sup>CTT</sup> (with and without a PE3b-  
235 ngRNA) at 5 weeks. Animals were treated with AAV-PEmax-nT and AAV-W3-synth-cT. Data  
236 are displayed as means±s.d. of at least three animals. Each data point represents one animal.  
237 ITR, inverted terminal repeat; nT/cT, N-/C-terminal PEmax AAV vector; phsyn, human  
238 synapsin promoter; NLS, nuclear localization signal; nSpCas9, SpCas9 nickase; M-MLV,  
239 Moloney Murine Leukemia virus; W3, woodchuck hepatitis virus post-transcriptional  
240 regulatory element; hU6/mU6, human/mouse U6 promoter; SV40, Simian virus 40; pA, polyA  
241 signal; synth, synthetic polyA signal; bGH, bovine growth hormone polyA signal; kbp,  
242 kilobasepairs; vg, vector genomes; wks, weeks; m, months; SM, silent mutation; pCbh,  
243 truncated chimeric CMV/chicken-β-actin hybrid promoter.

244

### 245 **Installing the *Adrb1*<sup>A187V</sup> mutation in newborn mice increases activity and exploration**

246 The *Adrb1*<sup>A187V</sup> variant has recently been shown to induce increased activity and short sleep in  
247 humans and mice<sup>7</sup>. Hence, we next assessed if installing *Adrb1*<sup>A187V</sup> in the brain of newborn  
248 mice changed their activity. First, we monitored mice in their home cage during the light- and  
249 dark cycle using infrared motion sensors 4 weeks after injection of epegRNA1 in the PE3b  
250 approach. In line with previous reports<sup>7</sup>, treated animals displayed longer active periods, with  
251 a significant increase compared to saline-injected controls or *Dnmt1*-targeting AAV controls  
252 during the dark cycle (Fig. 3a). Next, we employed the open field (OF) test to assess whether  
253 locomotor activity was increased (Fig. 3b). Our results showed that treated mice covered  
254 significantly more distance (46.9±9.0m vs. 38.5±9.4m in the light cycle and 50.4±7.9m vs.  
255 44.3±8.2m in the dark cycle; fig. 3c) and moved at higher velocity than control animals

256 (14.6±0.8 cm/s vs. 13.4±1.3cm/s in the light and 16.5±1.2cm/s vs. 14.5±1.5cm/s in the dark  
 257 cycle; fig. 3c). We further observed an increase in the frequency of wall-supported rearings in  
 258 treated animals, both in the OF (Fig. 3c) and when animals were placed in an unfamiliar  
 259 environment (Fig. 3d), indicating enhanced exploratory behavior in treated animals<sup>39</sup>. Notably,  
 260 we did not detect a significant increase in stress- or anxiety-related responses in the OF<sup>40,41</sup> or  
 261 light-dark (LD) transition test <sup>42</sup> (Extended data fig. 11). Since  $\beta$ -ARs are also important for  
 262 memory<sup>14</sup>, we further assessed memory performance using the novel object (NO) recognition  
 263 test (Extended data fig. 11c). Our data did not indicate signs of memory impairment in response  
 264 to the *Adrb1*<sup>A187V</sup> mutation (Extended data fig. 11c). In fact, although not significant, *Adrb1*-  
 265 treated mice spent on average slightly more time with the novel object (58.0±8.7% vs.  
 266 51.8±6.7%; extended data fig. 11d), suggesting that the *Adrb1*<sup>A187V</sup> variant might have a  
 267 beneficial impact on learning and memory.  
 268

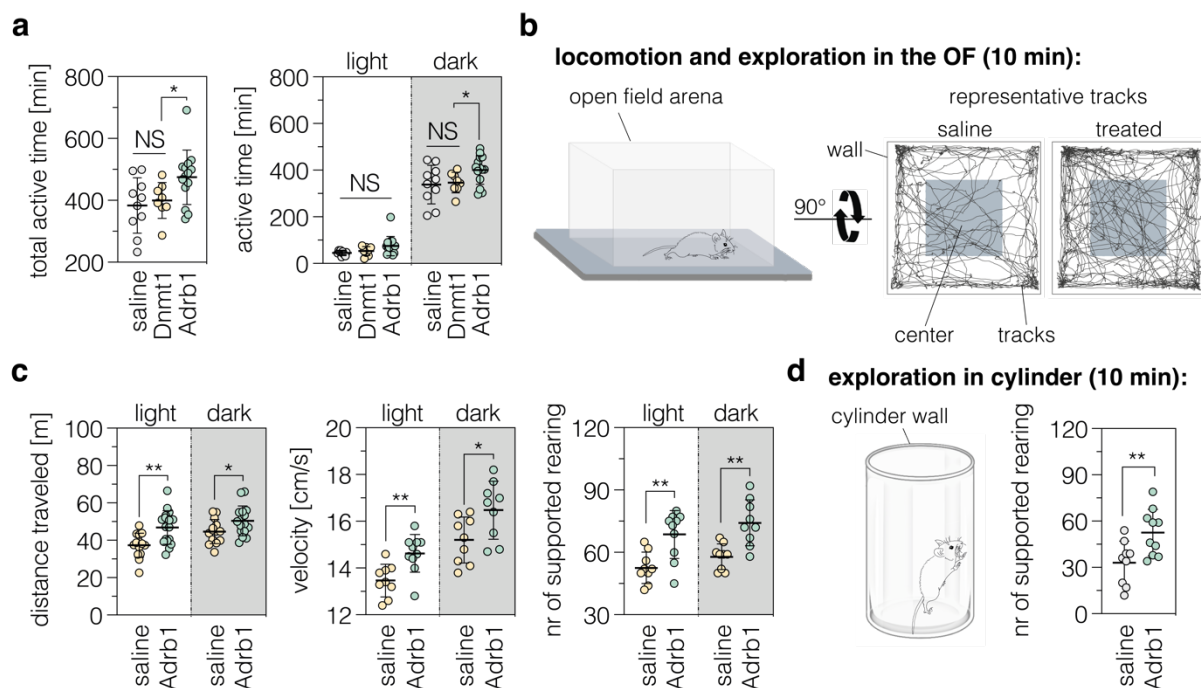

269  
 270 **Figure 3: The *Adrb1*<sup>A187V</sup> mutation increases locomotor activity and exploratory behavior**  
 271 **in newborn mice.** (a) General activity (expressed as total active time) in the home cage during  
 272 the light and dark cycle (n=9-15 mice per group). (b) Schematic representation of the OF test  
 273 and representative tracks of control and treated mice. (c) Locomotor activity, velocity, and  
 274 supported rearing in the OF (n=9-15 mice per group). (d) Schematic representation and  
 275 quantification of supported rearing in a cylinder (n=9-10 mice per group). The duration of each  
 276 test is indicated in brackets (b,d). PE-treated and saline-injected mice were kept in a 12:12  
 277 light/dark cycle; areas highlighted in gray indicate the dark cycle. Data are displayed as

278 means $\pm$ s.d. and were analyzed using a two-tailed Student's *t*-test with Welch's correction  
279 ( $*P<0.05$ ;  $**P<0.005$ ). Each data point represents one animal. NS, not significant.

280

281 Both on-target editing ( $9.1\pm 4.1\%$ ) and indel formation ( $2.0\pm 0.9\%$ ) was detected in cortices of  
282 treated animals at experimental endpoints (Extended data fig. 12a). Since *Adrb1*<sup>A187V</sup> is a  
283 dominant negative allele that leads to reduced protein stability<sup>7</sup>, indel mutations may also  
284 contribute to the observed behavioral phenotype. To exclude that the effects are solely a  
285 consequence of indel formation, we repeated the OF test with newborn animals treated with  
286 PEmax and epegRNA-SM<sup>CTT</sup>, which did not show indels above background (Extended data  
287 fig. 12a). In line with our previous observations (Fig. 3c), also epegRNA-SM<sup>CTT</sup>-treated mice  
288 displayed a significant increase in locomotor activity during the light phase ( $43.9\pm 6.0$ m vs.  
289  $31.2\pm 5.7$ m; extended data fig. 12b), with a direct correlation between the traveled distance and  
290 *Adrb1*<sup>A187V</sup> editing rates but not indel rates (Extended data fig. 12c). Next, we assessed if the  
291 observed phenotype could be related to pegRNA-dependent off-targets effects. We used  
292 CHANGE-seq<sup>43</sup> to experimentally identify potential off-target binding sites of the *Adrb1*  
293 protospacer, which were then analyzed by deep sequencing. Importantly, in the top 5 identified  
294 off-target sites we observed no differences in indels or substitutions between PE- and saline-  
295 treated animals (Extended data fig. 13). Taken together, our data indicate that installation of  
296 the *Adrb1*<sup>A187V</sup> mutation in newborn mice induced a behavioral phenotype.

297

### 298 **Installing *Adrb1*<sup>A187V</sup> in the mPFC of adult mice increases general activity and exploration**

299 Next we analyzed which brain regions might be associated with the alterations in animal  
300 behavior, and separately quantified editing rates in regions where *Adrb1* is expressed<sup>7,44-46</sup>  
301 (Extended data fig. 14a). Deep amplicon sequencing revealed that editing rates were several  
302 fold higher in the medial prefrontal cortex (mPFC) ( $12.2\pm 4.5\%$ ) compared to the other areas  
303 with *Adrb1* expression, including the hippocampal formation (dorsal:  $2.7\pm 1.7\%$ , ventral:  
304  $3.1\pm 1.7\%$ ), lateral septal nucleus ( $1.8\pm 1.0\%$ ), caudate putamen ( $3.6\pm 1.4\%$ ), amygdala  
305 ( $1.3\pm 1.2\%$ ), thalamus ( $3.0\pm 0.9\%$ ), paraventricular nucleus ( $0.6\pm 0.3\%$ ), midbrain ( $1.5\pm 1.4\%$ ),  
306 dorsal pons ( $0.4\pm 0.2\%$ ), and medulla oblongata ( $0.4\pm 0.4\%$ ) (Extended data fig. 14b). These  
307 results prompted us to assess if installing *Adrb1*<sup>A187V</sup> directly in the mPFC via intracranial AAV  
308 injection in adult mice could lead to similar phenotypes (Fig. 4a). Deep amplicon sequencing  
309 of tissue isolated from the mPFC of mice treated with PEmax and epegRNA-SM<sup>CTT</sup> revealed  
310 editing rates of  $5.8\pm 2.6\%$  (Fig. 4b). This value, however, is likely an underestimation of editing

311 in mPFC neurons, because dissected tissues also contained surrounding regions of the mPFC  
 312 and glial cells. 4 weeks post-injection we performed behavioral tests with treated and untreated  
 313 control animals. While, in contrast to newborns treated via ICV injection, locomotor activity  
 314 and velocity were comparable between treated and control animals (Fig. 4d), the active time in  
 315 the home cage as well as the frequency of wall-supported rearings was significantly increased  
 316 (Fig. 4c,d). Moreover, similar to our observations in newborn animals, we did not observe an  
 317 increase in anxiety-related behavior in the OF, but a trend for enhanced memory performance  
 318 in the NO recognition test (Fig. 4f). Together, these results indicate that the behavioral  
 319 phenotypes observed in ICV-treated newborns are partly caused by *Adrb1*<sup>A187V</sup> positive  
 320 neurons of the mPFC, although it is likely that editing in other brain areas with *Adrb1*  
 321 expression also contributed to the observed behavioral phenotype.  
 322

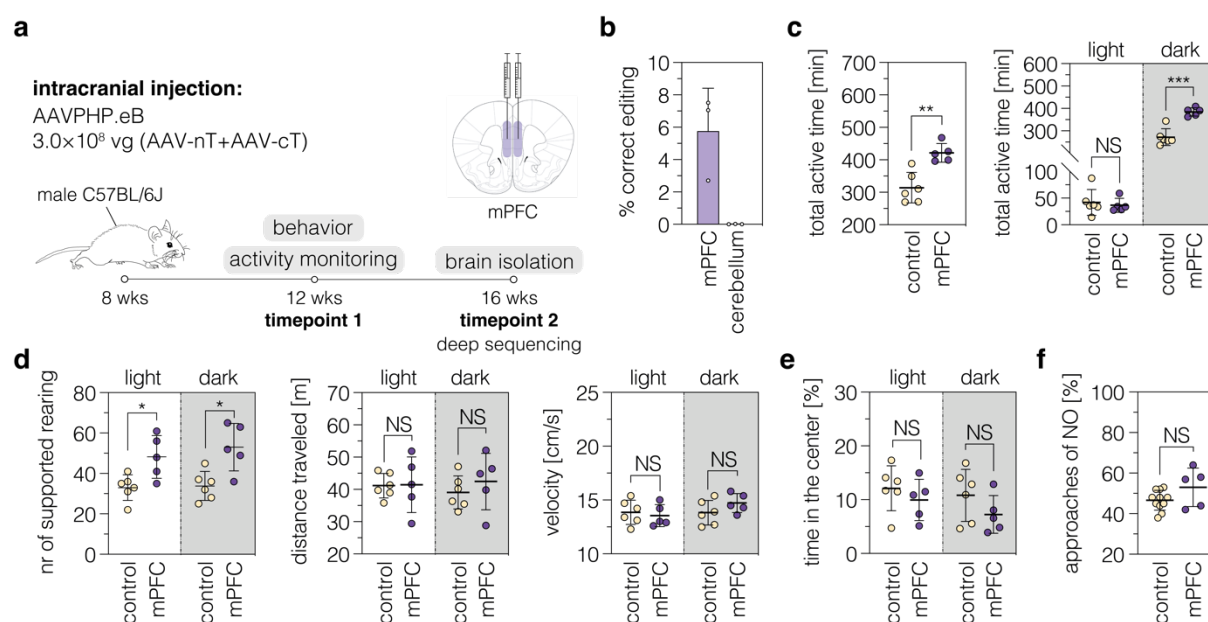

323  
 324 **Figure 4: *Adrb1*<sup>A187V</sup> in the mPFC increases general activity and exploration in adult mice.**

325 (a) Schematic depiction of the experimental setup used to introduce the *Adrb1*<sup>A187V</sup> mutation  
 326 into the mPFC of adult male mice. (b) Editing and indel rates in the mPFC and surrounding  
 327 areas of adult mice after intracranial delivery of prime editing components. The cerebellum  
 328 was used as a negative control. (c) Comparison of general activity in the home cage of controls  
 329 and animals treated in the mPFC. (d) Supported rearings, locomotor activity, and velocity in  
 330 the OF for treated (n=5 mice) and control mice (n=6 mice) in the light and dark cycle. Data are  
 331 displayed as means±s.d. of at least 5 animals per group and were analyzed using a two-tailed  
 332 Student's t-test with Welch's correction (\**P*<0.05; \*\**P*<0.005; \*\*\**P*<0.0005). Each data  
 333 point represents one animal.

## 334 Discussion

335 In our study we developed an approach for *in vivo* prime editing in the brain. Delivery of  
336 optimized AAV vectors encoding for intein-split PEs into the brain of newborn mice resulted  
337 in editing rates of up to 44.0% at the *Dnmt1* locus and 28.1% at the *Adrb1* locus in the cortex.  
338 Introducing the *Adrb1*<sup>A187V</sup> mutation was greatly enhanced using the PE3b approach, in which  
339 a second ngRNA is employed to cut the unedited strand after editing at the PAM strand  
340 occurred. In addition, we found that prime editing precision can be increased by introducing a  
341 silent mutation in the PAM, which circumvents retargeting of the edited locus by the PE  
342 complex. Notably, at the *Adrb1*<sup>A187V</sup> site the integration of a silent mutation in the PAM led to  
343 decreased editing rates *in vivo*. However, it is uncertain whether this observation can be  
344 generalized, as a comprehensive evaluation across multiple sites would be required.

345 In line with previous studies analyzing the behavior of heterozygous and homozygous  
346 *Adrb1*<sup>A187V</sup> mice<sup>7</sup>, introducing the *Adrb1*<sup>A187V</sup> mutation into newborn mice via prime editing  
347 led to increased activity, locomotion, and exploratory behavior, with a direct correlation  
348 between editing rates and active time in the home cage or traveled distance in the OF (Extended  
349 data fig. 12; extended data fig. 15). Increased activity has also been observed in animals where  
350 *Adrb1*<sup>A187V</sup> was specifically introduced into neurons of the mPFC, suggesting that this region  
351 plays an important role for *Adrb1*<sup>A187V</sup> effects on behavior.

352 Together our experiments provide proof-of-concept for prime editing in the brain to  
353 modulate neural circuits and animal behavior. Since  $\beta$ 1-ARs are important for various brain  
354 functions, the developed tools could prove valuable for modulating  $\beta$ 1-AR function in specific  
355 brain regions in the context of health and disease. Moreover, *in vivo* prime editing in the brain  
356 could also be employed to correct various genetic brain disorders, including psychiatric  
357 disorders or neurodegenerative diseases.

358

## 359 Main references

- 360 1. Anzalone, A. V. *et al.* Search-and-replace genome editing without double-strand  
361 breaks or donor DNA. *Nature* (2019) doi:10.1038/s41586-019-1711-4.
- 362 2. Chen, P. J. *et al.* Enhanced prime editing systems by manipulating cellular  
363 determinants of editing outcomes. *Cell* **184**, (2021).
- 364 3. Jang, H. *et al.* Application of prime editing to the correction of mutations and  
365 phenotypes in adult mice with liver and eye diseases. *Nat. Biomed. Eng.* (2021)  
366 doi:10.1038/s41551-021-00788-9.

- 367 4. Liu, P. *et al.* Improved prime editors enable pathogenic allele correction and cancer  
368 modelling in adult mice. *Nat. Commun.* **12**, (2021).
- 369 5. Böck, D. *et al.* In vivo prime editing of a metabolic liver disease in mice. *Sci. Transl.*  
370 *Med.* **14**, (2022).
- 371 6. Davis, J. R. *et al.* Efficient prime editing in mouse brain, liver and heart with dual  
372 AAVs. *Nat. Biotechnol.* **2023** 1–12 (2023) doi:10.1038/s41587-023-01758-z.
- 373 7. Shi, G. *et al.* A Rare Mutation of  $\beta$ 1-Adrenergic Receptor Affects Sleep/Wake  
374 Behaviors. *Neuron* **103**, (2019).
- 375 8. Anzalone, A. V., Koblan, L. W. & Liu, D. R. Genome editing with CRISPR–Cas  
376 nucleases, base editors, transposases and prime editors. *Nature Biotechnology* (2020)  
377 doi:10.1038/s41587-020-0561-9.
- 378 9. Lin, Q. *et al.* Prime genome editing in rice and wheat. *Nat. Biotechnol.* (2020)  
379 doi:10.1038/s41587-020-0455-x.
- 380 10. Schene, I. F. *et al.* Prime editing for functional repair in patient-derived disease  
381 models. *Nat. Commun.* (2020) doi:10.1038/s41467-020-19136-7.
- 382 11. Nelson, J. W. *et al.* Engineered pegRNAs improve prime editing efficiency. *Nat.*  
383 *Biotechnol.* (2021) doi:10.1038/s41587-021-01039-7.
- 384 12. Berridge, C. W., Schmeichel, B. E. & España, R. A. Noradrenergic modulation of  
385 wakefulness/arousal. *Sleep Medicine Reviews* vol. 16 (2012).
- 386 13. Broese, M., Riemann, D., Hein, L. & Nissen, C.  $\alpha$ -Adrenergic receptor function,  
387 arousal and sleep: Mechanisms and therapeutic implications. *Pharmacopsychiatry* vol.  
388 45 (2012).
- 389 14. Ramos, B. P. *et al.* The beta-1 adrenergic antagonist, betaxolol, improves working  
390 memory performance in rats and monkeys. *Biol. Psychiatry* **58**, (2005).
- 391 15. Sugama, S. *et al.* Stress-induced microglial activation occurs through  $\beta$ -adrenergic  
392 receptor: Noradrenaline as a key neurotransmitter in microglial activation. *J.*  
393 *Neuroinflammation* **16**, (2019).
- 394 16. Fu, A., Li, X. & Zhao, B. Role of  $\beta$ 1-adrenoceptor in the basolateral amygdala of rats  
395 with anxiety-like behavior. *Brain Res.* **1211**, (2008).
- 396 17. Bylund, D. B. Beta adrenoceptors. in *xPharm: The Comprehensive Pharmacology*  
397 *Reference* (2007). doi:10.1016/B978-008055232-3.60199-0.
- 398 18. Alhayek, S. & Preuss, C. V. *Beta 1 Receptors. StatPearls* (2018).
- 399 19. Dong, Q., Ptáček, L. J. & Fu, Y. H. Mutant  $\beta$ 1-adrenergic receptor improves REM  
400 sleep and ameliorates tau accumulation in a mouse model of tauopathy. *Proc. Natl.*

- 401 *Acad. Sci. U. S. A.* **120**, (2023).
- 402 20. Woodard, L. E. & Wilson, M. H. PiggyBac-ing models and new therapeutic strategies.  
403 *Trends in Biotechnology* (2015) doi:10.1016/j.tibtech.2015.06.009.
- 404 21. Dang, Y. *et al.* Optimizing sgRNA structure to improve CRISPR-Cas9 knockout  
405 efficiency. *Genome Biol.* **16**, (2015).
- 406 22. Ferreira da Silva, J. *et al.* Prime editing efficiency and fidelity are enhanced in the  
407 absence of mismatch repair. *Nat. Commun.* **13**, (2022).
- 408 23. Iyer, R. R. & Pluciennik, A. DNA Mismatch Repair and its Role in Huntington's  
409 Disease. *Journal of Huntington's Disease* vol. 10 (2021).
- 410 24. Eshleman, J. R. & Markowitz, S. D. Mismatch repair defects in human carcinogenesis.  
411 *Human Molecular Genetics* vol. 5 (1996).
- 412 25. Li, X. *et al.* Highly efficient prime editing by introducing same-sense mutations in  
413 pegRNA or stabilizing its structure. *Nat. Commun.* **13**, (2022).
- 414 26. Passini, M. A., Watson, D. J. & Wolfe, J. H. Gene delivery to the mouse brain with  
415 adeno-associated virus. *Methods Mol. Biol.* **246**, (2004).
- 416 27. Dong, B., Nakai, H. & Xiao, W. Characterization of genome integrity for oversized  
417 recombinant AAV vector. *Mol. Ther.* (2010) doi:10.1038/mt.2009.258.
- 418 28. Zetsche, B., Volz, S. E. & Zhang, F. A split-Cas9 architecture for inducible genome  
419 editing and transcription modulation. *Nature Biotechnology* (2015)  
420 doi:10.1038/nbt.3149.
- 421 29. Truong, D. J. J. *et al.* Development of an intein-mediated split-Cas9 system for gene  
422 therapy. *Nucleic Acids Res.* (2015) doi:10.1093/nar/gkv601.
- 423 30. Villiger, L. *et al.* Treatment of a metabolic liver disease by in vivo genome base  
424 editing in adult mice. *Nature Medicine* (2018) doi:10.1038/s41591-018-0209-1.
- 425 31. Levy, J. M. *et al.* Cytosine and adenine base editing of the brain, liver, retina, heart and  
426 skeletal muscle of mice via adeno-associated viruses. *Nat. Biomed. Eng.* (2020)  
427 doi:10.1038/s41551-019-0501-5.
- 428 32. Koblan, L. W. *et al.* In vivo base editing rescues Hutchinson–Gilford progeria  
429 syndrome in mice. *Nature* (2021) doi:10.1038/s41586-020-03086-7.
- 430 33. Kügler, S., Kilic, E. & Bähr, M. Human synapsin 1 gene promoter confers highly  
431 neuron-specific long-term transgene expression from an adenoviral vector in the adult  
432 rat brain depending on the transduced area. *Gene Therapy* vol. 10 (2003).
- 433 34. Grünewald, J. *et al.* Engineered CRISPR prime editors with compact, untethered  
434 reverse transcriptases. *Nat. Biotechnol.* (2022) doi:10.1038/S41587-022-01473-1.

- 435 35. Koblan, L. W. *et al.* Improving cytidine and adenine base editors by expression  
436 optimization and ancestral reconstruction. *Nat. Biotechnol.* (2018)  
437 doi:10.1038/nbt.4172.
- 438 36. Koblan, L. W. *et al.* In vivo base editing rescues Hutchinson–Gilford progeria  
439 syndrome in mice. *Nature* (2021).
- 440 37. Mathiesen, S. N., Lock, J. L., Schoderboeck, L., Abraham, W. C. & Hughes, S. M.  
441 CNS Transduction Benefits of AAV-PHP.eB over AAV9 Are Dependent on  
442 Administration Route and Mouse Strain. *Mol. Ther. - Methods Clin. Dev.* **19**, (2020).
- 443 38. Gray, S. J. *et al.* Optimizing promoters for recombinant adeno-associated virus-  
444 mediated gene expression in the peripheral and central nervous system using self-  
445 complementary vectors. *Hum. Gene Ther.* **22**, (2011).
- 446 39. Sturman, O., Germain, P. L. & Bohacek, J. Exploratory rearing: a context- and stress-  
447 sensitive behavior recorded in the open-field test. *Stress* **21**, (2018).
- 448 40. Kraeuter, A. K., Guest, P. C. & Sarnyai, Z. The Open Field Test for Measuring  
449 Locomotor Activity and Anxiety-Like Behavior. in *Methods in Molecular Biology* vol.  
450 1916 (2019).
- 451 41. Seibenhener, M. L. & Wooten, M. C. Use of the open field maze to measure locomotor  
452 and anxiety-like behavior in mice. *J. Vis. Exp.* (2015) doi:10.3791/52434.
- 453 42. Bourin, M. & Hascoët, M. The mouse light/dark box test. *European Journal of*  
454 *Pharmacology* vol. 463 (2003).
- 455 43. Lazzarotto, C. R. *et al.* CHANGE-seq reveals genetic and epigenetic effects on  
456 CRISPR–Cas9 genome-wide activity. *Nat. Biotechnol.* **38**, (2020).
- 457 44. Hagen, H., Hansen, N. & Manahan-Vaughan, D.  $\beta$ -Adrenergic Control of  
458 Hippocampal Function: Subservicing the Choreography of Synaptic Information Storage  
459 and Memory. *Cereb. Cortex* **26**, (2016).
- 460 45. Volk, N. *et al.* MicroRNA-19b associates with Ago2 in the amygdala following  
461 chronic stress and regulates the adrenergic receptor beta 1. *J. Neurosci.* **34**, (2014).
- 462 46. Sjöstedt, E. *et al.* An atlas of the protein-coding genes in the human, pig, and mouse  
463 brain. *Science (80-. )*. **367**, (2020).
- 464 47. Düring, D. N. *et al.* Fast Retrograde Access to Projection Neuron Circuits Underlying  
465 Vocal Learning in Songbirds. *Cell Rep.* **33**, (2020).
- 466 48. Schindelin, J. *et al.* Fiji: An open-source platform for biological-image analysis.  
467 *Nature Methods* (2012) doi:10.1038/nmeth.2019.
- 468 49. Paxinos, G. & Franklin, K. B. J. *The Mouse Brain in Stereotaxic Coordinates*, 2nd



469 edition. *Academic Press* (2001).

470 50. Clement, K. *et al.* CRISPResso2 provides accurate and rapid genome editing sequence  
471 analysis. *Nature Biotechnology* (2019) doi:10.1038/s41587-019-0032-3.

472 51. Matsuo, M., Coon, S. L. & Klein, D. C. RGS2 is a feedback inhibitor of melatonin  
473 production in the pineal gland. *FEBS Lett.* **587**, (2013).

474

## 475 **Methods**

476

### 477 Generation of plasmids

478 To generate pegRNA plasmids, annealed spacer, scaffold, and 3' extension oligos were cloned  
479 into the BsaI-digested pU6-pegRNA-GG- (Addgene #132777), pU6-tevopreQ1-GG-  
480 (Addgene #174038) or pU6-tmpknot-GG-acceptor plasmid (Addgene #174039) using Golden  
481 Gate assembly as previously described<sup>1,11</sup>. ngRNA and shRNA plasmids were generated by  
482 ligating annealed and phosphorylated oligos into a BsmBI-digested lentiGuide-Puro (Addgene  
483 #52963) or an EcoRI-digested pLKO.1 backbone using T4 DNA ligase (Addgene #8453). To  
484 generate intein-split PE plasmids, inserts were either ordered as gBlocks from Integrated DNA  
485 Technologies (IDT) or amplified from pCMV-PE2 (Addgene #132775) or pCMV-PEmax  
486 (Addgene #174820) plasmids using PCR. Inserts were cloned into the NotI- and EcoRI-  
487 digested pCMV-PE2 backbone using HiFi DNA Assembly Master Mix [New England Biolabs  
488 (NEB)]. To generate PiggyBac reporter plasmids for the *Adrb1* locus, inserts with homology  
489 overhangs for cloning were ordered from IDT and cloned into the XbaI- and EcoRI-digested  
490 pPB-Zeocin backbone using HiFi DNA Assembly Master Mix (NEB). To prepare plasmids for  
491 AAV production, inserts with homology overhangs were either ordered as gBlocks (IDT) or  
492 generated by PCR. Inserts were cloned into XbaI- and NotI-digested AAV backbones using  
493 HiFi DNA Assembly Master Mix (NEB). All PCRs were performed using Q5 High-Fidelity  
494 DNA Polymerase (NEB). The identity of all plasmids was confirmed by Sanger Sequencing.  
495 Primers used for cloning all plasmids are listed in extended data tables 1-3. Amino acid  
496 sequences of intein-split PEmax p.713/p.714 constructs are listed in extended data table 4.

497

### 498 Cell culture transfection and genomic DNA preparation

499 HEK293T [American Type Culture Collection (ATCC) CRL-3216] and Hepa1-6 (ATCC  
500 CRL-1830) cells were maintained in Dulbecco's modified Eagle's medium (DMEM) plus  
501 GlutaMAX (Thermo Fisher Scientific), supplemented with 10% (v/v) fetal bovine serum (FBS)  
502 and 1% penicillin/streptomycin (Thermo Fisher Scientific) at 37°C and 5% CO<sub>2</sub>. Neuro2a

503 (ATCC CCL-131) cells were maintained in Eagle's Minimum Essential Medium (EMEM),  
504 supplemented with 10% (v/v) FBS and 1% penicillin/streptomycin. Cells were passaged every  
505 3 to 4 days and maintained at confluency below 90%.

506 Cells were seeded in 96-well cell culture plates (Greiner) and transfected at 70% confluency  
507 using 0.5  $\mu$ l Lipofectamine<sup>TM</sup> 2000 (Thermo Fisher Scientific). If not stated otherwise, 300 ng  
508 of PE, 100 ng of pegRNA, 40 ng of nicking sgRNA (where indicated), and 150 ng of dnMLH1  
509 (Addgene #174824) were used for transfection. When intein-split PEs were transfected, 300 ng  
510 of each PE half was used. Cells were incubated for 3 days after transfection.

511 Genomic DNA from cells was isolated using a lysis buffer (10 mM Tris-HCl, 2 % Triton<sup>TM</sup>  
512 X-100, 1 mM EDTA, proteinase K [20 mg/mL]; Thermo Fisher Scientific). Cells were lysed  
513 at 60°C for 1 h, followed by 10 min at 95°C. Lysates were further diluted with 60  $\mu$ L of dH<sub>2</sub>O.  
514 Genomic DNA from mouse tissues was isolated by phenol/chloroform extraction. First, tissue  
515 samples were incubated overnight in lysis buffer (50 mM Tris-HCl pH 8.0, 100 mM EDTA,  
516 100 mM sodium chloride, and 1% SDS; Thermo Fisher Scientific) at 55°C and 300 rpm.  
517 Subsequently, phenol/chloroform/isoamyl alcohol (25:24:1, Thermo Fisher Scientific) was  
518 added and samples were centrifuged (5 min, maximum speed). The upper phase was transferred  
519 to a clean tube and DNA was precipitated using 100% ethanol (Sigma-Aldrich). Samples were  
520 centrifuged (5 min, maximum speed) and pellets were washed using cold 70% ethanol (-20°C).  
521 Washed pellets were dried at 55°C for 10 min and resuspended in 100  $\mu$ L of dH<sub>2</sub>O.

522

### 523 Generation of the reporter and MMR-deficient cell lines

524 To generate *Adrb1* reporter cell lines with the PiggyBac transposon, HEK, Hepa, and N2a cells  
525 were seeded into a 48-well cell culture plate (Greiner) and transfected at 70% confluency with  
526 225 ng of the PiggyBac-transposon and 25 ng of the transposase using Lipofectamine 2000  
527 (Thermo Fisher Scientific) according to the manufacturer's instructions. Three days after  
528 transfection, cells were enriched for 10 days using Zeocin selection [150  $\mu$ g/ml].

529 MMR-deficient *Adrb1* reporter cell lines were generated using lentivirus transduction of  
530 shRNAs, targeting murine or human *Mlh1/MLH1* or *Msh2/MSH2*. For lentivirus production,  
531 HEK293T cells were seeded into a 6-well cell culture plate (Greiner) and transfected with 1500  
532 ng of cargo, 400 ng of VSV-G (Addgene #8454), and 1100 ng of PAX2 (Addgene #12260)  
533 plasmid using polyethylenimine (PEI, Polysciences). The cell culture medium was exchanged  
534 12 h after transfection and the virus was harvested 24 h later. Supernatants containing lentiviral  
535 particles were added to HEK, Hepa, and N2a *Adrb1* reporter cell lines, which were seeded into

536 6-well cell culture plates (Greiner) one day prior to transduction. Transduced cells were  
537 enriched for 7 days with Puromycin [2.5 µg/mL].

538

### 539 AAV production

540 For the production of a pseudo-typed vector (AAV2 serotype PHP.eB) expressing EGFP under  
541 the control of the Cbh promoter,  $2 \times 10^8$  HEK293T cells were seeded per 150 mm dish (5 dishes  
542 in total) 24 h prior to transfection. For transfection, the helper plasmid (25 µg per dish), capsid  
543 plasmid (15 µg per dish) and cargo plasmid (9 µg per dish) were mixed with serum-free DMEM  
544 (Thermo Fisher Scientific) and polyethylenimine (PEI, Polyscience) was added in a 1:3 ratio  
545 (1 mg of DNA to 3 mg of PEI). The mix was incubated for 20 min at RT and then added to the  
546 cells. After 5 days of incubation at 37°C and 5% CO<sub>2</sub>, cells were harvested and centrifuged for  
547 15 min at 1'500×g in a conical corning flask (Thermo Fisher Scientific). 150 mL of the  
548 supernatant were mixed with 22 mL of NaCl (5M) and 30 mL of PEG8000 (VWR) in a new  
549 corning flask. The cell pellet was resuspended in 4 mL of resuspension buffer (150 mM NaCl,  
550 50 mM Tris-HCl, pH 8.0) and homogenized using a Precellys Evolution homogenizer (2  
551 cycles: 5'000 rpm for 45 sec with 15 sec break). 300 units of benzonase (Sigma-Aldrich) were  
552 added to the disrupted cells and the mixture was incubated for 30 min at 37°C in a water bath.  
553 After centrifugation at 5'000×g for 1h, the supernatant was collected and mixed with the  
554 supernatant after harvesting. AAV particles in this mixture were precipitated for 2 days at 4°C,  
555 followed by centrifugation at 10'000×g for 30 min. The supernatant was discarded and the  
556 AAV particles were washed using 4 mL of resuspension buffer. Particles were resuspended in  
557 1.5 mL of NaCl [5M]. Next, four fractions of OptiPrep GradientDensity medium (Sigma-  
558 Aldrich) were prepared (15%, 25%, 40%, and 60%). The most concentrated fraction was  
559 prepared at the bottom of the ultracentrifugation tube and least concentrated fraction at the top  
560 of the tube. The virus suspension was added at the top of the tube and the gradient was  
561 ultracentrifuged at 65'000 rpm at 15°C for 2 h. AAV particles were harvested from the 40%  
562 gradient fraction and filtered using a pre-washed 100 kDa Amicon (Vivaspin). Virus particles  
563 were subsequently washed multiple times with PBS (pH 7.4, Thermo Fisher Scientific) and  
564 physical titers were measured using a Qubit 3.0 fluorometer and the Qubit dsDNA HS assay  
565 kit (Thermo Fisher Scientific).

566 All other pseudo-typed vectors (AAV2 serotype PHP.eB) were produced by the Viral  
567 Vector Facility of the Neuroscience Center Zurich. Briefly, AAV vectors were ultracentrifuged  
568 and diafiltered. Physical titers (vector genomes per milliliter, vg/mL) were determined using a

569 Qubit 3.0 fluorometer (Thermo Fisher Scientific) as previously published<sup>47</sup>. The identity of the  
570 packaged genomes of each AAV vector was confirmed by Sanger sequencing.

571

#### 572 Negative staining and electron microscopy

573 First, carbon-coated electron microscopy (EM) grids (200 mesh, Quantifoil) were glow-  
574 discharged. Grids were briefly washed with a drop of 0.01% bovine serum albumin (BSA,  
575 Sigma-Aldrich). Subsequently, 2  $\mu$ L of the sample was applied to the grid and incubated for 5  
576 min. Excess liquid was removed from the edge of the grid with filter paper (Whatman). Next,  
577 grids were washed with 1 mM EDTA (Sigma-Aldrich), followed by staining with 0.5% uranyl  
578 acetate for 1 min. The liquid was again removed from the edge of the grid with filter paper and  
579 grids were dried overnight before imaging. Data were collected using an FEI Talos 120 kV  
580 transmission electron microscope (Thermo Fisher Scientific) equipped with a digital CMOS  
581 camera. Micrographs of several grid squares were collected for each AAV preparation to  
582 determine the ratio of fully packaged, partially packaged, and empty AAV particles. Data were  
583 quantified using MAPS (Thermo Fisher Scientific) and Fiji<sup>48</sup>.

584

#### 585 Animal studies

586 Animal experiments were performed in accordance with protocols approved by the Kantonalen  
587 Veterinäramt Zürich and in compliance with all relevant ethical regulations. C57BL/6J mice  
588 were housed in a pathogen-free animal facility at the Institute of Pharmacology and Toxicology  
589 of the University of Zurich. Mice were kept in a temperature- and humidity-controlled room  
590 on a 12-hour light-dark cycle. Mice were fed a standard laboratory chow (Kliba Nafag no. 3437  
591 with 18.5% crude protein).

592 Unless stated otherwise, newborn mice (P1) received  $5.0 \times 10^{10}$  vg per animal and construct  
593 via intracerebroventricular injection (ICV). Adult male C57BL/6J mice at P50-P60 were used  
594 to perform surgeries for the delivery of PE-AAVs (dose of  $3.0 \times 10^8$  vg per hemisphere).  
595 Buprenorphine [0.1 mg/kg body weight] was administered to mice subcutaneously 30 min prior  
596 to surgery. Animals were anesthetized using isoflurane (5% isoflurane with 1000 mL/min in  
597 100% O<sub>2</sub>) and placed into a stereotaxic mouse frame on a warming surface to maintain body  
598 temperature. Anesthesia was maintained at 1.5-2.5% isoflurane with 400 mL/min in 100% O<sub>2</sub>  
599 during surgeries. AAVs were injected bilaterally into the medial prefrontal cortex (mPFC) at  
600 the coordinates relative to bregma: 1.8 mm anteroposterior (AP);  $\pm$  0.4 mm mediolateral (ML);  
601  $-1.8$  mm dorsoventral (DV) and dorsal pons (dPons,  $-5.1$  mm AP;  $\pm$  0.5 mm ML;  $-3.5$  mm

602 DV). 400 nL injections were performed using a glass needle at a speed of 50 nL/min. The  
603 needle was slowly removed 3 min after injection and the wound was sutured using Vicryl 5-0  
604 suture (Ethicon).

605 Behavior experiments and activity monitoring were performed at 4 weeks post injection.  
606 Newborn mice were euthanized at 5, 10 or 24 weeks of age. Adult mice were euthanized at 16  
607 weeks of age.

608

#### 609 Behavioral assays

610 For the open field tests, a 50×50×50 cm chamber made of black plastic walls and a white floor  
611 was used. Mice were placed in the center of the open field and their activity was automatically  
612 recorded for 10 min from the top (C270 HD Webcam, Logitech). Tests were conducted under  
613 background dim illumination (intensity 30 Lx) in the light phase, and under dim red light  
614 (intensity 30 Lx) in the dark phase. All tests were performed at least 2 hours after the respective  
615 light phase onset and finished at least 2 h before the onset of the next light/dark cycle. To  
616 minimize the stress of mice, animals were brought into the experimental room in their home  
617 cages at least 1 h prior to the test. Locomotor activity was automatically quantified as distance  
618 traveled during a 10 minutes period using a custom-written MATLAB script. The average  
619 speed of a mouse was calculated as the distance covered during the running time divided by  
620 the time the mouse spent running. Running ‘episodes’ were automatically detected as the time  
621 intervals when the instant velocity of the mouse was higher than a given threshold of 5 cm/s.  
622 Instant velocity of the mouse was calculated for a sliding window of 4 frames.

623 For the assessment of anxiety-like behaviors, time spent in the center of the OF arena was  
624 automatically quantified using a custom-written MATLAB script or time spent in the light  
625 compartment in the light-dark transition test (20x20x20 cm each) and transitions from the dark  
626 to the light compartment were manually quantified. The dark box was covered with an opaque  
627 lid and the light box was covered with a transparent top during the 10 min experiment.

628 For the assessment of explorative behavior, wall-supported rearing in the OF was manually  
629 quantified in the light and dark phases. For additional analysis of explorative behavior, mice  
630 were placed in a cylinder and recorded for 10 min from the side. Wall-supported rearing in the  
631 cylinder was manually quantified in the light phase.

632 For analysis of memory performance, the same OF arena as described above was used. On  
633 day 1, animals were habituated to the arena for 10 min. On day 2, animals were placed into the

634 arena with two identical for 10 min. On day 3, one of the objects was replaced and the number  
635 of approaches of the novel object was manually quantified for 10 min.

636 For monitoring the activity of the mice using motion sensors, animals were single-housed  
637 and an infrared sensor was placed on top of the home cage. After 1-week of habituation, activity  
638 was recorded for at least 5 consecutive days and data were analyzed using ClockLab  
639 (Actimetrics).

640

#### 641 Trans-cardiac perfusion, brain isolation, and dissection of brain regions

642 Sodium Pentobarbital (Kantonsapotheke Zürich) was injected via intraperitoneal injection at a  
643 dose of 100 mg/kg. Complete anesthesia was confirmed by the absence of a toe pinch reflex.  
644 Mice were placed on the perfusion stage inside a collection pan and the peritoneal cavity was  
645 exposed. The diaphragm was cut through laterally and the rib cage was cut parallel to the lungs,  
646 creating a chest “flap”. The flap was clamped in place using a hemostat (Fine Science Tools)  
647 and a 25 gauge needle (Sterican), attached to silicon tubing and a peristaltic pump, was inserted  
648 into the left ventricle. The right atrium was cut for drainage. Animals were first perfused with  
649 ice-cold PBS (Thermo Fisher Scientific) at a rate of 10 mL/min, followed by perfusion with  
650 ice-cold fixative (4% paraformaldehyde, PFA, Sigma-Aldrich). When brains were used for a  
651 single cell, DNA, RNA, or protein isolation, perfusion was performed exclusively with PBS.  
652 Once the perfusion was complete, mice were decapitated and the skull was removed with  
653 scissors and tweezers without inflicting damage to the underlying tissue. The brain was  
654 removed using a spatula.

655 For histology, PFA-perfused brains were post-fixated in 4% PFA for 4h, followed by  
656 overnight incubation in 30% sucrose. For the dissection of brain regions, PBS-perfused brains  
657 were first rinsed in PBS and then cut into 1 mm slices using an acrylic mouse brain matrix  
658 (AgnThos) and razor blades. The olfactory bulb, cortex, hippocampus, striatum, thalamus,  
659 hypothalamus, midbrain, hindbrain, and cerebellum were identified based on the mouse brain  
660 atlas<sup>49</sup>. To dissect *Adrb1*-expressing regions with high precision, 60 µm sections of PBS-  
661 perfused brains were prepared, and the region of interest was isolated under a stereomicroscope  
662 using the mouse brain atlas<sup>49</sup>.

663

#### 664 RNA isolation and RT-qPCR

665 RNA was isolated from cultured or isolated cells or snap-frozen brain tissues using the RNeasy  
666 Mini Kit (Qiagen) or the RNeasy Lipid Tissue Mini Kit (Qiagen) according to the

667 manufacturer's instructions. RNA (1000 ng input) was subsequently reverse-transcribed to  
668 cDNA using random primers and the GoScript RT kit (Promega). RT-qPCR was performed  
669 using FIREPoly qPCR Master Mix (Solis BioDyne) and analyzed using a Lightcycler 480  
670 system (Roche). Fold changes were calculated using the  $\Delta$ Ct method. Primers used for RT-  
671 qPCR are listed in extended data table 5.

672

### 673 Protein isolation and western blot

674 Protein was isolated from cultured cells using radioimmunoprecipitation (RIPA) assay buffer  
675 (150 mM Tris pH 8.0, 150 mM NaCl, 0.1% SDS, 0.5% sodium deoxycholate, 1% NP-40;  
676 Thermo Fisher Scientific), supplemented with protease inhibitor cocktail (Roche). Protein  
677 concentrations of all samples were determined using the Pierce Bicinchoninic Acid (BCA)  
678 Protein Assay Kit (Thermo Fisher Scientific).

679 Equal amounts of protein (*in vitro* samples: 30  $\mu$ g) were separated by SDS-polyacrylamide  
680 gel electrophoresis (Thermo Fisher Scientific) and transferred to a 0.45- $\mu$ m nitrocellulose  
681 membrane (Amersham). Membranes were incubated with rabbit anti-Adrb1 (1:1,000; cat. no.  
682 ab85037, Abcam) and mouse anti-actin beta (1:2,000; cat. no. ab8226; Abcam). Signals were  
683 detected by fluorescence using IRDye-conjugated secondary antibodies (LI-COR Biosciences)  
684 and a LICOR Odyssey <sup>®</sup> DLx imaging system. All antibodies are listed in extended data table  
685 6.

686

### 687 Single-cell isolation by MACS

688 PBS-perfused brains were cut into small pieces and dissociated using the Adult Brain  
689 Dissociation Kit and gentleMACS Octo Dissociator with heaters (Miltenyi Biotec) according  
690 to the manufacturer's instructions. Cell debris and myelin was subsequently removed using a  
691 debris removal solution (Miltenyi Biotec). The single-cell suspension was used for the isolation  
692 of neurons using the Adult Neuronal Isolation kit (Miltenyi Biotec) according to the  
693 manufacturer's instructions.

694 The identity of all fractions was confirmed by flow cytometry and RT-qPCR. Briefly, cells  
695 were resuspended in FACS buffer (PBS supplemented with 2% FBS and 2 mM EDTA). Fc  
696 blocking reagent (1:50 in FACS buffer) was added to all samples and incubated on ice for 20  
697 min. Samples were subsequently labeled with primary antibodies (ACSA-2, O4, CD11b,  
698 Biotin, eFluor789, in FACS buffer) for 1 h at 4°C (in the dark). Cell suspensions were washed  
699 three times in FACS buffer and filtered through a 35- $\mu$ m nylon mesh cell strainer snap caps

700 (Corning) and kept on ice until analysis. For each sample, 10,000-50,000 events were counted  
701 on an LSRFortessa (BD Biosciences) using the FACSDiva software version 8.0.1 (BD  
702 Biosciences). Experiments were performed with three replicates/mice. The gating strategy is  
703 shown in extended data fig. 8. RT-qPCR primers and antibodies are listed in extended data  
704 tables 4 and 5.

705

#### 706 Amplification for deep sequencing

707 Genomic DNA from cultured cells or brain tissues was isolated by direct lysis (cells) or  
708 phenol/chloroform extraction (brain tissue). *Adrb1*- or *Dnmt1*-specific primers were used to  
709 generate targeted amplicons for deep sequencing. Input genomic DNA was first amplified in a  
710 10 $\mu$ L reaction for 30 cycles using NEBNext High-Fidelity 2 $\times$ PCR Master Mix (NEB).  
711 Amplicons were purified using AMPure XP beads (Beckman Coulter) and subsequently  
712 amplified for eight cycles using primers with sequencing adapters. Approximately equal  
713 amounts of PCR products were pooled, gel purified, and quantified using a Qubit 3.0  
714 fluorometer and the dsDNA HS Assay Kit (Thermo Fisher Scientific). Paired-end sequencing  
715 of purified libraries was performed on an Illumina Miseq. Primers for deep sequencing are  
716 listed in extended data table 7.

717

#### 718 HTS data analysis

719 Sequencing reads were first demultiplexed using the Miseq Reporter (Illumina). Next,  
720 amplicon sequences were aligned to their reference sequences using CRISPResso2<sup>50</sup>. Prime  
721 editing efficiencies were calculated as percentage of (number of reads containing only the  
722 desired edit)/(number of total aligned reads). Indel rates were calculated as percentage of  
723 (number of indel-containing reads)/(total aligned reads). Reference sequences are listed in  
724 extended data table 8.

725

#### 726 Immunohistochemistry

727 PFA-fixed brain tissues were frozen on dry ice and cut into 40  $\mu$ m-thick sections using a  
728 microtome. Sections were blocked in PBS supplemented with 2% normal donkey serum (cat.  
729 no. ab7475, abcam) and 0.3% Triton X-100 (Sigma-Aldrich) for 1 h. Brain sections were  
730 incubated with primary antibodies overnight at 4°C (mouse-NeuN, 1:500, abcam ab177487;  
731 rabbit-Cas9, 1:1,000, Cell Signaling clone D8Y4K; chicken-GFAP, 1:1'500, abcam ab95231).  
732 Donkey anti-mouse-568 (1:500), donkey anti-chicken-647 (1:500) and donkey anti-rabbit-488



733 (1:1,000; all from Jackson ImmunoResearch) were used as secondary antibodies and sections  
734 were counterstained with 4',6-diamidino-2-phenylindole (DAPI, Sigma-Aldrich). Mounting  
735 was performed using Prolong Gold Antifade Mountant (Thermo Fisher Scientific). Confocal  
736 images were taken with a Zeiss LSM 800 or a Zeiss AxioScan.Z1 slidescanner and analyzed  
737 with Fiji<sup>48</sup>. Antibodies are listed in extended data table 6.

738

### 739 Statistical analysis

740 All statistical analyses were performed using GraphPad Prism 9.0.0 for macOS. If not stated  
741 otherwise, data are represented as biological replicates and are depicted as means±s.d.  
742 Statistical analyses are always indicated in the corresponding figure legends. Likewise, sample  
743 sizes and the statistical tests performed are described in the respective figure legends. The data  
744 were tested for normality using the Shapiro-Wilk test if not stated otherwise. Unpaired two-  
745 tailed Student's *t*-tests were performed followed by the appropriate post hoc test when more  
746 than two groups were compared. For all analyses,  $p < 0.05$  was considered statistically  
747 significant.

748

### 749 **Methods references**

- 750 47. Düring, D. N. *et al.* Fast Retrograde Access to Projection Neuron Circuits Underlying  
751 Vocal Learning in Songbirds. *Cell Rep.* **33**, (2020).
- 752 48. Schindelin, J. *et al.* Fiji: An open-source platform for biological-image analysis.  
753 *Nature Methods* (2012) doi:10.1038/nmeth.2019.
- 754 49. Paxinos, G. & Franklin, K. B. J. The Mouse Brain in Stereotaxic Coordinates, 2nd  
755 edition. *Academic Press* (2001).
- 756 50. Clement, K. *et al.* CRISPResso2 provides accurate and rapid genome editing sequence  
757 analysis. *Nature Biotechnology* (2019) doi:10.1038/s41587-019-0032-3.
- 758 51. Matsuo, M., Coon, S. L. & Klein, D. C. RGS2 is a feedback inhibitor of melatonin  
759 production in the pineal gland. *FEBS Lett.* **587**, (2013).

760

### 761 **Acknowledgements**

762 We thank the Functional Genomics Center Zurich for technical support and access to  
763 instruments at the University of Zurich. Furthermore, we acknowledge Andres Käch, José  
764 María Mateos Melero, and Johannes Riemann from the Center for Microscopy and Image  
765 Analysis at the University of Zurich for support with negative staining and TEM imaging of  
766 AAV preparations. We thank Steven Brown for his constructive feedback in the course of this

767 study and critical assessment of the data. We thank Martha Gjicolai and Sara Pierre-Ferrer for  
768 their help with infrared activity monitoring. We thank Hanns Ulrich Zeilhofer for sharing lab  
769 equipment and access to experimental rooms for behavior analyses. Members of the Schwank,  
770 Patriarchi, and Brown labs are acknowledged for discussions and comments on the manuscript.  
771 This work was supported by the Swiss National Science Foundation (SNSF) grant no.  
772 310030\_185293 (to G.S.), Novartis Foundation for Medical-Biological Research no. FN20-  
773 0000000203 (to D.B.), SNSF Spark fellowship no. 196287 (to D.B.), the URPP Itinerare (to  
774 G.S. and to D.B.) and the Helmut Horten Foundation (to G.S.).

775

#### 776 **Author contributions**

777 D.B. and G.S. designed the study. D.B., L.T., Y.W., E.I., T.R., L.S., and S.J. performed and  
778 analyzed *in vitro* experiments. E.I. produced and quantified AAV-PHP.eB pCbh-GFP particles  
779 used for quantification of transduction efficiencies across the brain. M.W., D.B., and L.T.  
780 performed and analyzed *in vivo* experiments. J.M. sectioned, stained, and imaged AAV-  
781 transduced brains. D.B. and G.S. wrote the manuscript with input from all coauthors. All  
782 authors reviewed the manuscript.

783

#### 784 **Data availability**

785 All data associated with this study are present in the paper. Illumina sequencing data will be  
786 made available at the Gene Expression Omnibus (GEO) database upon publication.

787

#### 788 **Competing interest declaration**

789 The authors declare no competing interests.

790

#### 791 **Supplementary information**

792 The supplementary information file contains extended data figures 1-15 and extended data  
793 tables 1-8.

794

#### 795 **Correspondence**

796 Correspondence should be addressed to G. Schwank ([schwank@pharma.uzh.ch](mailto:schwank@pharma.uzh.ch)).

797
